# Supplementary material for: The global, regional, and national burden of endocarditis from 1990 to 2021: an analysis of the global burden of disease study 2021
Source: Research Square preprint supplement (doi:10.21203/rs.3.rs-6404736/v1), 2025-06-26
Supplement: Supplementary file 1 [file 5740ad793598bea1e2d0ed36.docx]

Table S1. The death cases and rates for endocarditis in1990-2021 and its temporal trends.

|  | **1990** | |  | **2021** | | **1990-2021** |
| --- | --- | --- | --- | --- | --- | --- |
|  | counts | rate |  | counts | rate | EAPC(95 %CI) |
| Global | 36883.49(31645.96,40522.30) | 0.97(0.84,1.05) |  | 77843.89(69010.02,86337.76) | 0.96(0.85,1.07) | 0.19(0.08,0.29) |
| Male | 19472.61(15931.34,22699.73) | 1.09(0.93,1.27) |  | 40094.01(35273.74,45550.56) | 1.10(0.97,1.24) | 0.15(0.08,0.22) |
| Female | 17410.87(14247.46,19925.06) | 0.85(0.71,0.96) |  | 37749.88(31155.09,43488.05) | 0.83(0.69,0.96) | 0.20(0.07,0.34) |
| High SDI | 11759.72(10768.15,12355.18) | 1.10(1.00,1.15) |  | 31485.08(26951.93,34018.34) | 1.34(1.18,1.44) | 0.88(0.72,1.04) |
| High-middle SDI | 5656.03(4984.26,6182.51) | 0.63(0.56,0.69) |  | 12497.96(11240.03,13378.62) | 0.70(0.63,0.75) | 0.60(0.48,0.72) |
| Middle SDI | 8371.45(6769.22,9820.12) | 0.74(0.61,0.90) |  | 13864.93(12121.52,17626.08) | 0.56(0.49,0.71) | -0.83(-0.91,-0.74) |
| Low-middle SDI | 6900.14(5268.23,8219.72) | 0.98(0.76,1.19) |  | 12137.62(9925.55,14664.21) | 0.83(0.68,1.01) | -0.41(-0.45,-0.38) |
| Low SDI | 4163.18(2594.87,5308.09) | 1.55(1.00,2.02) |  | 7782.14(5220.33,10127.15) | 1.30(0.89,1.68) | -0.45(-0.51,-0.38) |
| Andean Latin America | 149.13(109.48,188.94) | 0.53(0.39,0.66) |  | 247.15(196.83,300.38) | 0.40(0.32,0.49) | -0.75(-0.87,-0.63) |
| Australasia | 112.22(103.62,119.32) | 0.50(0.46,0.53) |  | 623.00(536.47,682.31) | 1.09(0.96,1.18) | 2.71(2.41,3.02) |
| Caribbean | 217.63(184.44,270.49) | 0.74(0.64,0.91) |  | 500.46(412.96,601.86) | 0.98(0.80,1.18) | 0.90(0.79,1.00) |
| Central Asia | 114.58(102.15,131.31) | 0.20(0.18,0.22) |  | 149.13(130.34,167.53) | 0.18(0.15,0.20) | -0.16(-0.34,0.01) |
| Central Europe | 505.35(480.75,542.86) | 0.36(0.34,0.38) |  | 1274.21(1163.13,1389.25) | 0.63(0.58,0.69) | 2.06(1.80,2.32) |
| Central Latin America | 426.50(411.78,445.44) | 0.37(0.36,0.39) |  | 1337.11(1178.37,1505.46) | 0.54(0.48,0.61) | 1.33(0.95,1.70) |
| Central Sub-Saharan Africa | 464.07(243.56,658.67) | 1.79(1.01,2.58) |  | 1018.28(557.85,1506.79) | 1.68(0.94,2.54) | -0.16(-0.21,-0.12) |
| East Asia | 3365.17(1842.53,4424.47) | 0.40(0.22,0.52) |  | 2813.30(2367.59,3539.12) | 0.17(0.14,0.21) | -2.82(-3.09,-2.55) |
| Eastern Europe | 728.52(694.04,763.08) | 0.28(0.27,0.30) |  | 2563.94(2381.50,2739.65) | 0.91(0.85,0.98) | 3.98(3.64,4.31) |
| Eastern Sub-Saharan Africa | 1868.05(1077.43,2504.03) | 1.94(1.15,2.64) |  | 3049.36(1987.26,4273.12) | 1.38(0.88,1.93) | -0.98(-1.06,-0.89) |
| High-income Asia Pacific | 17676.53(14789.38,21465.96) | 9.69(8.16,11.68) |  | 46149.21(39169.42,54241.70) | 12.82(10.80,14.99) | 0.88(0.35,1.42) |
| High-income North America | 31012.54(26255.91,37181.83) | 10.29(8.71,12.46) |  | 83306.68(71986.43,96229.24) | 15.54(13.68,17.82) | -0.07(-0.13,-0.01) |
| North Africa and Middle East | 19271.36(16143.14,23520.75) | 6.89(5.85,8.17) |  | 47329.49(40042.38,56557.50) | 8.88(7.59,10.40) | -1.32(-1.36,-1.28) |
| Oceania | 433.91(371.19,518.74) | 10.44(9.00,11.98) |  | 1095.01(958.29,1268.36) | 11.9(10.55,13.41) | 0.40(0.30,0.49) |
| South Asia | 31497.71(25612.19,39462.72) | 3.97(3.32,4.79) |  | 89375.78(75120.69,107802.03) | 5.52(4.62,6.55) | -0.39(-0.43,-0.34) |
| Southeast Asia | 2864.517(2498.891-3286.605) | 6.765(5.902-7.762) |  | 6680.43(5889.92-7538.46) | 5.83 (5.14-6.58) | -0.65(-0.71,-0.59) |
| Southern Latin America | 5452.49(4706.47,6317.52) | 11.71(10.14,13.49) |  | 14803.82(13021.93,16591.31) | 18.3(16.14,20.59) | 0.10(-0.05,0.25) |
| Southern Sub-Saharan Africa | 314.596(247.584-383.563) | 2.179(1.715-2.657) |  | 202.83(182.75-223.17) | 2.08 (1.88-2.29) | -0.38(-0.49,-0.27) |
| Tropical Latin America | 3587.81(2985.70,4369.76) | 8.23(7.05,9.75) |  | 5481.13(4639.81,6621.15) | 7.70(6.57,9.07) | 1.23(0.99,1.47) |
| Western Europe | 51578.76(43533.07,60080.52) | 10.92(9.25,12.88) |  | 134147.40(116364.20,154181.14) | 17.2(14.98,19.78) | 2.12(1.87,2.36) |
| Western Sub-Saharan Africa | 20412.03(17681.04,23927.32) | 10.08(8.84,11.63) |  | 39183.48(34219.09,45871.70) | 8.60(7.56,9.87) | -0.97(-1.14,-0.79) |
