# Supplementary material for: The global, regional, and national burden of endocarditis from 1990 to 2021: an analysis of the global burden of disease study 2021
Source: Research Square preprint supplement (doi:10.21203/rs.3.rs-6404736/v1), 2025-06-26
Supplement: Supplementary file 2 [file 57a268660d9ab86a4a68f6ce.docx]

Table S2.The DALY cases and rates for endocarditis in 1990/2021 and its temporal trends.

|  | **1990** | |  | **2021** | | **1990-2021** |
| --- | --- | --- | --- | --- | --- | --- |
| counts | rate |  | counts | rate | EAPC(95 %CI) |
| Global | 1333862.51(1056183.84,1508950.08) | 28.32(23.28,31.61) |  | 2076412.89(1827083.81,2308504.19) | 25.56(22.34,28.37) | -0.34(-0.45,-0.23) |
| Male | 753677.07(574654.28,866033.93) | 32.84(26.04,37.81) |  | 1200318.62(1007092.90,1393512.13) | 30.57(25.65,35.35) | -0.25(-0.34,-0.16) |
| Female | 580185.44(410614.29,690232.93) | 23.88(17.64,27.86) |  | 876094.27(705775.10,1006975.78) | 20.65(16.38,23.65) | -0.47(-0.60,-0.33) |
| High SDI | 250615.13(237800.19,260471.25) | 24.23(23.03,25.18) |  | 536898.55(489607.95,567759.15) | 28.62(26.65,29.98) | 0.65(0.45,0.85) |
| High-middle SDI | 199997.80(162891.68,228993.89) | 20.26(16.43,23.34) |  | 297630.17(279572.70,319558.69) | 18.28(17.13,19.83) | -0.41(-0.54,-0.27) |
| Middle SDI | 386463.44(298883.76,445526.55) | 25.57(20.64,29.57) |  | 456988.44(405398.02,570414.41) | 17.93(15.87,22.40) | -1.29(-1.38,-1.20) |
| Low-middle SDI | 306137.91(220302.71,369255.67) | 32.19(24.76,38.46) |  | 443018.12(360737.36,525611.73) | 26.00(21.24,30.94) | -0.68(-0.73,-0.62) |
| Low SDI | 189372.03(113107.27,240322.72) | 49.29(30.93,62.96) |  | 339524.18(220719.16,443733.24) | 40.71(27.37,52.99) | -0.68(-0.75,-0.62) |
| Andean Latin America | 7962.63(5554.04,10166.68) | 21.64(15.56,27.45) |  | 9992.34(7992.11,12380.36) | 15.55(12.46,19.21) | -1.05(-1.26,-0.84) |
| Australasia | 2664.39(2522.98,2807.70) | 11.82(11.19,12.44) |  | 11314.77(10254.08,12180.43) | 23.54(21.72,25.26) | 2.52(2.11,2.94) |
| Caribbean | 9929.91(8089.23,12703.55) | 29.65(24.65,37.56) |  | 19027.38(14887.64,23517.56) | 39.15(30.22,48.95) | 1.13(1.02,1.24) |
| Central Asia | 5955.83(5102.35,7211.01) | 8.70(7.62,10.21) |  | 6000.40(5208.96,6882.83) | 6.39(5.57,7.29) | -1.26(-1.54,-0.98) |
| Central Europe | 16836.89(16028.91,18074.99) | 12.37(11.77,13.26) |  | 33123.23(30400.34,36042.26) | 19.28(17.73,20.93) | 1.54(1.20,1.89) |
| Central Latin America | 22715.23(21739.88,23977.02) | 14.67(14.16,15.33) |  | 46052.79(40241.00,52614.00) | 18.43(16.06,21.16) | 0.95(0.40,1.50) |
| Central Sub-Saharan Africa | 20960.28(9848.66,29778.82) | 53.24(28.70,76.03) |  | 41708.07(22801.03,61469.50) | 47.91(26.50,70.81) | -0.35(-0.41,-0.29) |
| East Asia | 175398.82(91665.22,237141.90) | 16.02(8.43,21.60) |  | 70985.41(59079.68,92253.65) | 4.59(3.72,6.22) | -5.01(-5.46,-4.55) |
| Eastern Europe | 29307.57(27826.31,30957.00) | 11.96(11.35,12.67) |  | 96914.75(89999.25,103916.23) | 38.55(35.78,41.49) | 3.68(3.12,4.25) |
| Eastern Sub-Saharan Africa | 90181.08(50401.90,119385.48) | 63.38(37.19,85.55) |  | 142679.02(93701.29,199451.90) | 45.05(29.51,62.88) | -1.26(-1.32,-1.20) |
| High-income Asia Pacific | 33788.00(27708.93,38367.42) | 18.23(14.91,20.78) |  | 73249.83(59719.17,83213.48) | 15.34(13.37,17.40) | -1.13(-1.60,-0.66) |
| High-income North America | 125854.80(116765.22,135171.32) | 37.51(34.82,40.37) |  | 211635.07(195397.99,223604.68) | 38.51(35.96,40.51) | 0.10(-0.00,0.19) |
| North Africa and Middle East | 106060.59(72304.83,140663.75) | 32.59(25.32,40.42) |  | 96363.15(77215.01,121351.56) | 17.82(14.50,22.67) | -1.89(-1.92,-1.86) |
| Oceania | 3063.65(2115.46,4548.89) | 61.83(42.18,96.96) |  | 9093.30(6503.56,12389.91) | 75.41(54.52,104.32) | 0.91(0.81,1.01) |
| South Asia | 244851.15(172253.36,306249.78) | 29.39(21.68,36.13) |  | 401831.73(315555.35,481638.15) | 24.21(18.91,28.91) | -0.57(-0.62,-0.52) |
| Southeast Asia | 182932.69(149420.46,256915.18) | 49.26(39.74,69.70) |  | 254838.58(202734.28,361941.27) | 36.97(29.31,52.77) | -0.98(-1.07,-0.90) |
| Southern Latin America | 21711.88(19855.67,23234.80) | 46.57(42.58,49.84) |  | 31625.07(29434.42,33645.00) | 38.26(35.73,40.69) | -0.44(-0.63,-0.26) |
| Southern Sub-Saharan Africa | 18701.72(13082.87,22589.50) | 42.38(30.12,51.77) |  | 27175.79(23055.62,34834.15) | 35.81(30.26,45.86) | -0.52(-0.75,-0.29) |
| Tropical Latin America | 42306.18(40695.05,44431.12) | 31.19(30.07,32.63) |  | 84372.27(80580.21,87805.89) | 33.94(32.38,35.30) | 0.26(-0.07,0.60) |
| Western Europe | 99574.68(90137.55,111551.21) | 18.72(17.00,20.96) |  | 275986.76(246485.42,295826.49) | 30.60(28.18,32.38) | 2.09(1.69,2.49) |
| Western Sub-Saharan Africa | 73104.53(40161.48,100966.63) | 52.48(29.71,75.41) |  | 132443.17(72027.39,184106.07) | 37.21(20.96,52.34) | -1.37(-1.53,-1.22) |
