# Supplementary material for: The global, regional, and national burden of endocarditis from 1990 to 2021: an analysis of the global burden of disease study 2021
Source: Research Square preprint supplement (doi:10.21203/rs.3.rs-6404736/v1), 2025-06-26
Supplement: Supplementary file 3 [file 6ab37ac1f216d32c9043d075.docx]

Figure S1. Incidence rate(A), death rate(B), and DALY rate(C) of endocarditis for both sexes in 204 countries, in 2021.

Figure S2. Global counts and incidence (A), death (B) and DALY (C) rates of endocarditis by age and sex, 2021. Error bars indicate the 95 % uncertainty intervals (95 % UI) for incidence (A), death (B) and DALYs (C). Shading indicates the upper and lower limits of the 95 % UI.

Figure S3. Incidence rate(A), death rates(B), DALY rates(C) for endocarditis for 21 Global Burden of Disease regions from 1990 to 2021 by SDI. The black line represents the expected age-standardized DALY rates based solely on SDI.
